# Supplementary material for: Modified core–shell magnetic mesoporous zirconia nanoparticles formed through a facile “outside-to-inside” way for CT/MRI dual-modal imaging and magnetic targeting cancer chemotherapy
Source: PubMed Central journal article supplement — RSC Adv. 2019 Apr 30;9(23):13220–33. doi: 10.1039/c9ra01063g (PMC9063760; doi:10.1039/c9ra01063g), 2019-04-30
Supplement: RA-009-C9RA01063G-s001.pdf [file RA-009-C9RA01063G-s001.pdf]

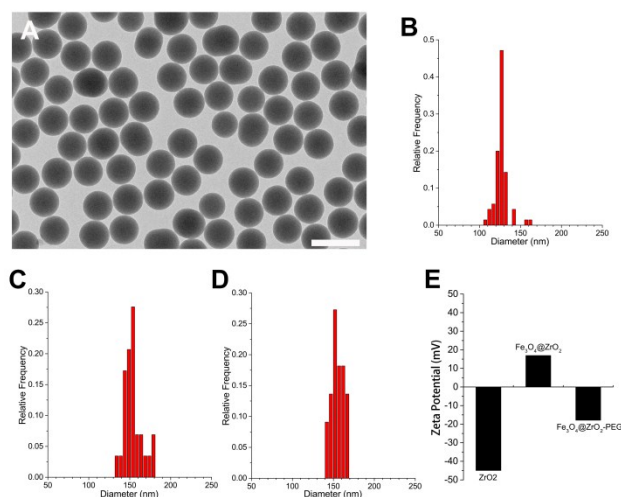

**Figure S1.** The structural characterization of samples. (A) TEM images of SiO<sub>2</sub> nanoparticles, scale bar represent 200 nm. Histogram of size distribution for the (B) SiO<sub>2</sub>, (C) ZrO<sub>2</sub> and (D) M-MZNs nanoparticles. (E) Zeta potentials of ZrO<sub>2</sub>, M-MZNs and M-MZNs-PEG.

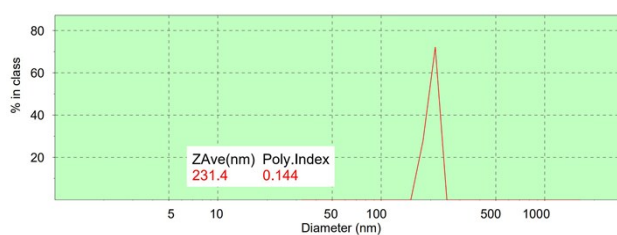

**Figure S2** Hydrodynamic diameter and polydispersity index of Fe<sub>3</sub>O<sub>4</sub>@ZrO<sub>2</sub>-PEG

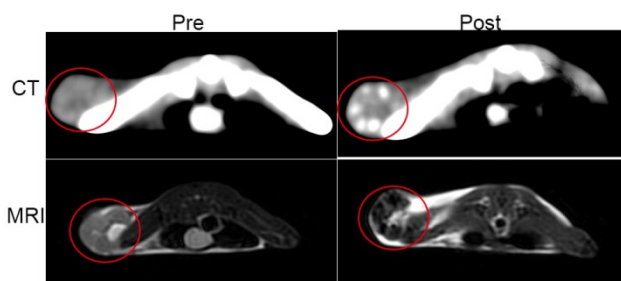

**Figure S3** *In vivo* CT and T2W MR images of a tumor bearing mouse before and after intratumoral injection of M-MZNs-DOX.
